# Supplementary material for: Subcellular Proteomics to Understand Promotive Effect of Plant-Derived Smoke Solution on Soybean Root
Source: MDPI journal article supplement (doi:10.3390/proteomes9040039), 2021-10-02
Supplement: s1 [file s1]

**Supplemental Table S1. Materials and methods**

|                                                                           |                                                                                                                                                                                                                                                                                                                                                                                                                                                                                                                                                                                                                                                                                                                                                                                                                                                                                                                                                                                                                                                                                                                                              |
|---------------------------------------------------------------------------|----------------------------------------------------------------------------------------------------------------------------------------------------------------------------------------------------------------------------------------------------------------------------------------------------------------------------------------------------------------------------------------------------------------------------------------------------------------------------------------------------------------------------------------------------------------------------------------------------------------------------------------------------------------------------------------------------------------------------------------------------------------------------------------------------------------------------------------------------------------------------------------------------------------------------------------------------------------------------------------------------------------------------------------------------------------------------------------------------------------------------------------------|
| Isolation of membrane fractions                                           | A portion (2.0 g) of samples was chopped and ground in 1 mL of permeabilization buffer using a mortar and pestle. Homogenates were transferred to a tube, and incubated for 10 min at 4°C with constant mixing and centrifuged at 16,000 x g for 15 min at 4°C to pellet permeabilized cells. The supernatant containing cytosolic proteins was removed and transferred to a new tube. The pellet was resuspended in 0.5 mL of solubilization buffer. After pipetting, a homogeneous suspension was obtained and incubated for 30 min at 4°C with constant mixing. After centrifugation at 16,000 x g for 15 min at 4°C, supernatant containing solubilized membrane and membrane-associated proteins were sonicated with lysis buffer consisting of 7 M urea, 2 M thiourea, 5% CHAPS, and 2 mM tributylphosphine. After sonication, the homogenate was centrifuged at 12,000 x g for 30 min at 4°C, and the supernatant was collected as membrane proteins.                                                                                                                                                                                 |
| Isolation of nuclear fractions                                            | A portion (2.0 g) of samples was ground with buffer. The homogenates were filtered through a double layer of filter mesh and centrifuged at 1,000 x g for 10 min at 4°C. The resulting pellet was resuspended in nuclei isolation buffer containing protease inhibitor mixture (Roche, Werk Penzberg, Germany) and layered on top of cushions containing 60% Percoll prepared in 1x nuclei isolation buffer and 2.3 M sucrose. After centrifugation at 3,200 x g for 30 min at 4°C, the middle layer was collected and washed with nuclei isolation buffer containing protease inhibitor mixture to remove Percoll and sucrose. The purified nucleus was vortexed with extraction buffer and sonicated. After sonication, the homogenate was centrifuged at 12,000 x g for 30 min at 4°C, and the supernatant was collected as nuclear proteins.                                                                                                                                                                                                                                                                                             |
| Immunoblot analysis                                                       | Quantified proteins (10 µg) were separated by electrophoresis on a 10% SDS-polyacrylamide gel and transferred onto a polyvinylidene difluoride membrane using a semidry transfer blotter (Nippon Eido, Tokyo, Japan). The blotted polyvinylidene difluoride membrane was blocked for 5 min in Bullet Blocking One reagent (Nacalai Tesque, Kyoto, Japan). After blocking, the polyvinylidene difluoride membrane was cross-reacted with a 1: 1000 dilution of the primary antibodies for 1 h at room temperature. As primary antibodies, anti- H <sup>+</sup> ATPase (Agrisera, Vannas, Sweden), anti-histone H3 (Abcam, Tokyo, Japan), anti-calnexin, and anti-ascorbate peroxidases antibodies were used. Anti-rabbit IgG conjugated with horseradish peroxidase (Bio-Rad, Hercules, CA, USA) was used as the secondary antibody. After 1 h incubation, signals were detected using TMB Membrane Peroxidase Substrate Kit (Seracare, Milford, MA, USA) following protocol from the manufacturer. The integrated densities of bands were calculated using Image J software (version 1.8; National Institutes of Health, Bethesda, MD, USA). |
| Protein enrichment, reduction, alkylation, and digestion                  | Methanol (400 µL) was added to each sample and mixed before addition of 100 µL of chloroform and 300 µL of water. After mixing and centrifugation at 20,000 x g for 10 min to achieve phase separation, the upper phase was discarded and 300 µL of methanol was added to the lower phase, and then centrifuged at 20,000 x g for 10 min (20). The pellet was collected and resuspended in 50 mM ammonium bicarbonate. It was reduced with 50 mM dithiothreitol for 30 min at 56°C and alkylated with 50 mM iodoacetamide for 30 min at 37°C. Alkylated proteins were digested with trypsin and lysyl endopeptidase (Wako, Osaka, Japan) at a 1:100 enzyme/protein ratio for 16 h at 37°C. Peptides were desalted with MonoSpin C18 Column (GL Sciences, Tokyo, Japan) and acidified with 1% trifluoroacetic acid.                                                                                                                                                                                                                                                                                                                           |
| Protein identification using nano-liquid chromatography mass spectrometry | The peptides were loaded onto the LC system (EASY-nLC 1200; Thermo Fisher Scientific) equipped with a trap column (Acclaim PepMap 100 C18 LC column, 3 µm, 75 µm ID x 20 mm; Thermo Fisher Scientific), equilibrated with 0.1% formic acid, and eluted with a linear acetonitrile gradient (0-35%) in 0.1% formic acid at a flow rate of 300 nL min <sup>-1</sup> . The eluted peptides were loaded and separated on the column (NANO-HPLC capillary column C18, 3 µm, 75 µm x 150 mm; Nikkyo Technos) with a spray voltage of 2 kV (Ion Transfer Tube temperature: 275°C). The peptide ions were detected using MS (Orbitrap Fusion ETD MS; Thermo Fisher Scientific) in the data-dependent acquisition mode with the installed Xcalibur software (version 4.0; Thermo Fisher Scientific). Full-scan mass spectra were acquired in the MS over 375-1,500 m/z with resolution of 70,000. The most intense precursor ions were selected for collision-induced fragmentation in the linear ion trap at normalized collision energy of 35%. Dynamic exclusion was employed within 15 sec to prevent repetitive selection of peptides.           |
| Mass spectrometry data analysis                                           | The MS/MS searches were carried out using SEQUEST HT search algorithms against the UniprotKB <i>Glycine max</i> (SwissProt TrEMBL, TaxID=3847, version 2017-10-25) using Proteome Discoverer (PD) 2.2 (version 2.2.0.388; Thermo Fisher Scientific). The workflow for both algorithms included spectrum files RC, spectrum selector, MASCOT, SEQUEST HT search nodes, percolator, ptmRS, and minor feature detector nodes. Oxidation of methionine was set as a variable modification and carbamidomethylation of cysteine was set as a fixed modification. Mass tolerances in MS and MS/MS were set at 10 ppm and 0.6 Da,                                                                                                                                                                                                                                                                                                                                                                                                                                                                                                                   |

|                                                                |                                                                                                                                                                                                                                                                                                                                                                                                                                                                                                                                                                                                                                                                                                                                                                                                                                                                                                                                                                                              |
|----------------------------------------------------------------|----------------------------------------------------------------------------------------------------------------------------------------------------------------------------------------------------------------------------------------------------------------------------------------------------------------------------------------------------------------------------------------------------------------------------------------------------------------------------------------------------------------------------------------------------------------------------------------------------------------------------------------------------------------------------------------------------------------------------------------------------------------------------------------------------------------------------------------------------------------------------------------------------------------------------------------------------------------------------------------------|
|                                                                | respectively. Trypsin was specified as protease and a maximum of 2 missed cleavage was allowed. Target-decoy database searches used for calculation of false discovery rate and for peptide identification false discovery rate was set at 1%.                                                                                                                                                                                                                                                                                                                                                                                                                                                                                                                                                                                                                                                                                                                                               |
| Differential analysis of proteins using mass spectrometry data | Label-free quantification was also performed with PD 2.2 using precursor ions quantifier nodes. For differential analysis of the relative abundance of peptides and proteins between samples, the free software PERSEUS (version 1.6.14.0) (21) was used. Abundances of proteins and peptides abundances were transferred into log2 scale. Three biological replicates of each sample were grouped and a minimum of 3 valid values were required in at least one group. Normalization of the abundances was performed to subtract the median of each sample. Missing values were imputed based on a normal distribution (width = 0.3, down-shift = 1.8). Significance was assessed using Student's <i>t</i> -test analysis. Principal component analysis was performed with PD 2.2. The sequences of the differentially accumulated proteins were subjected to a BLAST query against the gene ontology database ( <a href="http://www.geneontology.org/">http://www.geneontology.org/</a> ). |
| Measurement of ATP Contents                                    | A portion (150 mg) of samples was homogenized in 100 $\mu$ L of ADP assay buffer, centrifuged at $16,000 \times g$ for 10 min at 4°C. For supernatant, sample deproteinization and neutralization were performed using Deproteinizing Sample Preparation Kit (Biovision). Extracts (50 $\mu$ L) were added in 50 $\mu$ L of reaction mixture containing ADP assay buffer, ADP probe, ADP converter, and ADP developer. After mixing, mixture was incubated at room temperature for 30 min in dark conditions and measured absorbance at 570 nm.                                                                                                                                                                                                                                                                                                                                                                                                                                              |

Supplemental Table 2. List of changed membrane proteins in soybean-root tip treated with plant-derived smoke solution compared with control

| Accession no | Description                              | MP | MW [kDa] | calc. pI | Abundance Ratio | P-Value |
|--------------|------------------------------------------|----|----------|----------|-----------------|---------|
| A0A0R0JYY8   | Tubulin beta chain                       | 12 | 49.9     | 5.01     | 100             | 0.0000  |
| A0A0R0KE60   | Uncharacterized protein                  | 7  | 30.1     | 4.31     | 100             | 0.0000  |
| I1KC25       | Acetolactate synthase                    | 7  | 71       | 7.01     | 100             | 0.0000  |
| I1JXH8       | Uncharacterized protein                  | 6  | 53.2     | 6.7      | 100             | 0.0000  |
| I1J8S9       | Uncharacterized protein                  | 5  | 24.1     | 5.34     | 100             | 0.0000  |
| I1L9X2       | PlsC domain-containing protein           | 5  | 43.2     | 9.38     | 100             | 0.0000  |
| I1KB56       | Uncharacterized protein                  | 5  | 37.7     | 9.58     | 100             | 0.0000  |
| K7KTN4       | Protein arginine N-methyltransferase     | 5  | 71.9     | 6.2      | 100             | 0.0000  |
| I1N696       | Uncharacterized protein                  | 4  | 54.9     | 5.63     | 100             | 0.0000  |
| I1N8B5       | Uncharacterized protein                  | 4  | 76       | 5.47     | 100             | 0.0000  |
| A0A0R4J4S6   | NADPH-protochlorophyllide oxidoreductase | 4  | 43.2     | 8.78     | 100             | 0.0000  |
| I1KPA0       | Protein kinase domain-containing protein | 4  | 54.8     | 5.43     | 100             | 0.0000  |
| K7MBG3       | Sucrose synthase                         | 4  | 91.5     | 6.24     | 100             | 0.0000  |
| K7MPG5       | Uncharacterized protein                  | 3  | 42.4     | 8.29     | 100             | 0.0000  |
| I1JBN4       | Uncharacterized protein                  | 3  | 26       | 7.77     | 100             | 0.0000  |
| I1L6A3       | Uncharacterized protein                  | 2  | 45.7     | 7.58     | 100             | 0.0000  |
| Q949H4       | Urease                                   | 2  | 90.7     | 6.18     | 100             | 0.0000  |
| I1K4K8       | Acyl-coenzyme A oxidase                  | 2  | 75.6     | 8.9      | 100             | 0.0000  |
| I1JMX7       | Rubryerythrin domain-containing protein  | 2  | 49       | 8.22     | 100             | 0.0000  |
| K7LLJ2       | Uncharacterized protein                  | 2  | 68.8     | 6.28     | 100             | 0.0000  |
| I1JUP4       | Oleosin                                  | 2  | 17.8     | 8.97     | 100             | 0.0000  |
| P11828       | Glycinin G3                              | 2  | 54.2     | 5.97     | 100             | 0.0000  |
| Q9XET1       | Seed maturation protein PM31             | 2  | 17.7     | 6.55     | 100             | 0.0000  |
| I1MCF0       | Uncharacterized protein                  | 2  | 45.2     | 6.43     | 100             | 0.0000  |
| A0A0R0EDR0   | Uncharacterized protein                  | 2  | 15.7     | 7.56     | 100             | 0.0000  |
| I1MT77       | Uncharacterized protein                  | 2  | 50.1     | 5.67     | 100             | 0.0000  |
| I1KJJ6       | Phytoeyanin domain-containing protein    | 2  | 19.2     | 6.76     | 100             | 0.0000  |
| O64458       | 34 kDa maturing seed protein             | 2  | 42.7     | 5.99     | 100             | 0.0000  |
| P11827       | Beta-conglycinin alpha' subunit          | 22 | 72.2     | 5.71     | 64.357          | 0.0000  |
| A0A368UIC9   | Uncharacterized protein                  | 9  | 38.7     | 6.47     | 46.242          | 0.0000  |
| I1N747       | Oleosin                                  | 3  | 23.6     | 8.94     | 31.747          | 0.0000  |
| A0A0R0HYM3   | Uncharacterized protein                  | 16 | 69.6     | 6.32     | 28.175          | 0.0000  |
| P19594       | 2S albumin                               | 5  | 18.4     | 5.34     | 22.006          | 0.0000  |
| K7KTR9       | Oleosin                                  | 2  | 22.6     | 8.7      | 21.778          | 0.0000  |
| P29531       | P24 oleosin isoform B                    | 4  | 23.4     | 8.94     | 20.186          | 0.0000  |
| I1L860       | Uncharacterized protein                  | 30 | 58       | 6.49     | 15.333          | 0.0000  |
| Q9ZNZ4       | Napin-type 2S albumin 1                  | 5  | 17.8     | 6.38     | 14.458          | 0.0000  |
| K7K4G2       | Cupin_1 domain-containing protein        | 19 | 71.7     | 5.49     | 14.084          | 0.0000  |
| I1LHP6       | Cupin_1 domain-containing protein        | 15 | 81.7     | 5.34     | 13.108          | 0.0000  |
| C6T586       | Uncharacterized protein                  | 3  | 22.7     | 5.58     | 12.672          | 0.0000  |
| C6SZ13       | Uncharacterized protein                  | 3  | 15.8     | 9.36     | 11.951          | 0.0000  |
| Q04672       | Sucrose-binding protein                  | 26 | 60.5     | 6.87     | 10.039          | 0.0000  |
| I1M3M9       | Uncharacterized protein                  | 14 | 67.9     | 6.58     | 9.91            | 0.0000  |
| A0A0R0JP17   | Oleosin                                  | 3  | 21.4     | 10.27    | 9.791           | 0.0000  |
| I1JF86       | Uncharacterized protein                  | 30 | 57.8     | 6.6      | 9.061           | 0.0000  |
| I1L849       | Uncharacterized protein                  | 10 | 27.4     | 5.29     | 8.906           | 0.0000  |
| Q42447       | Maturation protein                       | 8  | 25.6     | 6.52     | 8.576           | 0.0000  |
| K7LGJ7       | Aldo_ket_red domain-containing protein   | 4  | 36.5     | 7.49     | 8.224           | 0.0000  |
| I1NGG4       | Uncharacterized protein                  | 9  | 26       | 5.02     | 7.488           | 0.0000  |
| A0A0R0HVK7   | Uncharacterized protein                  | 5  | 22.2     | 6.52     | 7.229           | 0.0000  |

|            |                                                 |    |       |      |       |        |
|------------|-------------------------------------------------|----|-------|------|-------|--------|
| A0A0R0FSS4 | Uncharacterized protein                         | 4  | 23.8  | 6.27 | 7.063 | 0.0000 |
| Q9XER5     | Seed maturation protein PM22                    | 7  | 16.7  | 5.36 | 6.761 | 0.0000 |
| A0A0R0JWF4 | Uncharacterized protein                         | 3  | 84.8  | 7.42 | 6.646 | 0.0000 |
| P01071     | Trypsin inhibitor B                             | 12 | 20    | 4.82 | 6.629 | 0.0000 |
| C6T960     | Uncharacterized protein                         | 4  | 32    | 5.92 | 6.45  | 0.0000 |
| K7LEQ5     | Uncharacterized protein                         | 9  | 26.6  | 6.8  | 6.305 | 0.0000 |
| I1LPX6     | Fructose-bisphosphate aldolase                  | 6  | 42.8  | 7.33 | 6.163 | 0.0000 |
| I1LE41     | Uncharacterized protein                         | 8  | 26.2  | 4.89 | 5.786 | 0.0000 |
| I1JC17     | Aldedh domain-containing protein                | 19 | 58.5  | 6.95 | 5.589 | 0.0000 |
| C6T3A2     | Bet v 1 domain-containing protein               | 5  | 16.7  | 4.93 | 5.533 | 0.0000 |
| I1KAH2     | Branched-chain alpha keto-acid dehydrogenase E1 | 6  | 55.3  | 6.99 | 5.315 | 0.0000 |
| Q9ZTZ3     | Reticulon-like protein                          | 2  | 24.2  | 9.17 | 5.025 | 0.0000 |
| Q43468     | Hsp70-Hsp90 organizing protein 1                | 5  | 64.1  | 5.69 | 5.018 | 0.0000 |
| A0A0R0L186 | SHSP domain-containing protein                  | 3  | 17.3  | 7.42 | 5.013 | 0.0000 |
| I1M596     | Lipoxygenase                                    | 37 | 97.2  | 6.67 | 4.565 | 0.0000 |
| K7L4G7     | Uncharacterized protein                         | 4  | 95.3  | 6.48 | 4.183 | 0.0000 |
| A0A0R0JD77 | TENA_THI-4 domain-containing protein            | 3  | 33.6  | 7.87 | 4.154 | 0.0000 |
| Q9ZTY1     | 35 kDa seed maturation protein                  | 10 | 35.3  | 6.32 | 4.125 | 0.0000 |
| I1N2Z5     | Protein SLE1                                    | 5  | 12.2  | 5.38 | 4.098 | 0.0000 |
| Q9SWB2     | Seed maturation protein PM41                    | 2  | 8.2   | 4.97 | 4.044 | 0.0000 |
| I1L7P7     | Cytochrome c oxidase subunit 5C                 | 2  | 7.1   | 8.59 | 3.99  | 0.0000 |
| A0A0R0IV26 | Amidohydro-rel domain-containing protein        | 4  | 56.5  | 6.62 | 3.985 | 0.0000 |
| K7KGC7     | Sucrose synthase                                | 15 | 92.2  | 6.13 | 3.937 | 0.0000 |
| I1JFX0     | Usp domain-containing protein                   | 5  | 20.7  | 7.17 | 3.935 | 0.0000 |
| C6TFC1     | Non-specific lipid-transfer protein             | 2  | 12.4  | 8.63 | 3.911 | 0.0000 |
| I1MQD2     | BOWMAN_BIRK domain-containing protein           | 2  | 12.2  | 6.04 | 3.804 | 0.0000 |
| Q42795     | Beta-amylase                                    | 12 | 56    | 5.55 | 3.73  | 0.0000 |
| K7LDT9     | Uncharacterized protein                         | 12 | 103.3 | 6.76 | 3.666 | 0.0000 |
| I1JTU1     | Branched-chain-amino-acid aminotransferase      | 7  | 42    | 7.11 | 3.648 | 0.0000 |
| A0A0R0HA20 | Uncharacterized protein                         | 2  | 40    | 5.73 | 3.594 | 0.0002 |
| C6TFE2     | Uncharacterized protein                         | 6  | 22.6  | 8.95 | 3.555 | 0.0000 |
| B3TDK6     | Lipoxygenase                                    | 49 | 96.7  | 6.58 | 3.515 | 0.0000 |
| A0A0R0HAM0 | Uncharacterized protein                         | 4  | 41.8  | 6.52 | 3.498 | 0.0000 |
| A0A0R0H569 | Lipoxygenase                                    | 43 | 92.8  | 6.48 | 3.485 | 0.0000 |
| I1M396     | Knot1 domain-containing protein                 | 2  | 8.5   | 7.84 | 3.485 | 0.0000 |
| A0A0R0KSS1 | PKS_ER domain-containing protein                | 3  | 37.9  | 6.27 | 3.479 | 0.0009 |
| A0A0R0J965 | Uncharacterized protein                         | 9  | 34.4  | 6.9  | 3.381 | 0.0000 |
| I1LNN8     | DUF4149 domain-containing protein               | 2  | 39.9  | 9.29 | 3.354 | 0.0002 |
| I1KVT5     | Uncharacterized protein                         | 2  | 15.5  | 6.01 | 3.35  | 0.0002 |
| C6T0L2     | Protein SLE3                                    | 4  | 11.1  | 6.8  | 3.326 | 0.0000 |
| O23957     | Dehydrin                                        | 3  | 17.3  | 9.23 | 3.237 | 0.0000 |
| A0A0B5E8V1 | Tau class glutathione S-transferase             | 4  | 25.9  | 6.7  | 3.147 | 0.0000 |
| A0A0R0KL81 | Uncharacterized protein                         | 2  | 80.9  | 7.14 | 3.124 | 0.0003 |
| C6T1V2     | SHSP domain-containing protein                  | 3  | 17.7  | 6.81 | 3.1   | 0.0001 |
| C6T1Y2     | Ribulose bisphosphate carboxylase small chain   | 2  | 20    | 8.66 | 3.045 | 0.0005 |
| K7MQ84     | Asparagine synthetase [glutamine-hydrolyzing]   | 9  | 65.2  | 6.73 | 3.015 | 0.0012 |
| I1LN49     | Uncharacterized protein                         | 5  | 27    | 7.06 | 3.011 | 0.0000 |
| Q9S7N8     | Seed maturation protein PM21                    | 2  | 10.1  | 5.01 | 2.945 | 0.0013 |
| I1K554     | Knot1 domain-containing protein                 | 2  | 8.4   | 9.16 | 2.94  | 0.0000 |
| A0A0R4J594 | Peroxidase                                      | 4  | 34.8  | 7.9  | 2.939 | 0.0001 |
| G3E7M9     | Annexin                                         | 19 | 35.9  | 6.96 | 2.927 | 0.0000 |
| Q9SWB6     | Probable bifunctional TENA-E protein            | 10 | 26    | 5.35 | 2.905 | 0.0000 |
| I1KWA0     | Uncharacterized protein                         | 7  | 65.2  | 4.83 | 2.905 | 0.0007 |

|            |                                               |    |      |      |       |        |
|------------|-----------------------------------------------|----|------|------|-------|--------|
| I1L957     | Uncharacterized protein                       | 19 | 48.8 | 6.42 | 2.894 | 0.0000 |
| I1JLC8     | Protein SLE2                                  | 5  | 11.5 | 5.6  | 2.822 | 0.0000 |
| A0A0R0LK39 | Uncharacterized protein                       | 3  | 27.2 | 6.89 | 2.821 | 0.0008 |
| Q38JD2     | Temperature-induced lipocalin                 | 2  | 21.4 | 7.24 | 2.819 | 0.0021 |
| Q39801     | 51 kDa seed maturation protein                | 24 | 51   | 7.11 | 2.806 | 0.0000 |
| Q39873     | Lea protein                                   | 20 | 49.4 | 7.52 | 2.781 | 0.0000 |
| I1M307     | Bulb-type lectin domain-containing protein    | 3  | 48.8 | 6.64 | 2.767 | 0.0015 |
| I1JYK1     | SHSP domain-containing protein                | 2  | 26   | 7.96 | 2.763 | 0.0063 |
| I1LS05     | Uncharacterized protein                       | 5  | 45.8 | 7.02 | 2.761 | 0.0016 |
| A0A0R0FFL6 | Uncharacterized protein                       | 7  | 57.3 | 7.53 | 2.756 | 0.0003 |
| P26987     | Stress-induced protein SAM22                  | 6  | 16.8 | 4.82 | 2.742 | 0.0001 |
| I1LSS9     | Flavodoxin-like domain-containing protein     | 3  | 21.8 | 5.57 | 2.71  | 0.0092 |
| Q01417     | 18 kDa seed maturation protein                | 2  | 17.6 | 9.58 | 2.68  | 0.0000 |
| P04776     | Glycinin G1                                   | 16 | 55.7 | 6.23 | 2.665 | 0.0000 |
| C6TIE2     | AB hydrolase-1 domain-containing protein      | 2  | 35.3 | 5.3  | 2.65  | 0.0009 |
| Q9XET0     | Seed maturation protein PM30                  | 4  | 15.1 | 8.9  | 2.635 | 0.0000 |
| A0A0R0ENV4 | Uncharacterized protein                       | 8  | 23.5 | 5.3  | 2.595 | 0.0001 |
| I1JL80     | Ferritin                                      | 6  | 29.1 | 6.38 | 2.56  | 0.0000 |
| I1K6M2     | Uncharacterized protein                       | 5  | 23.8 | 7.87 | 2.551 | 0.0011 |
| I1MFL4     | PAP fibrillin domain-containing protein       | 4  | 33.3 | 5.86 | 2.544 | 0.0156 |
| C6SWV3     | Uncharacterized protein                       | 5  | 27.6 | 6.1  | 2.539 | 0.0012 |
| I1LLR5     | Uncharacterized protein                       | 6  | 27.7 | 5.71 | 2.526 | 0.0002 |
| A0A0R4J3N3 | SHSP domain-containing protein                | 2  | 18.2 | 7.5  | 2.514 | 0.0075 |
| Q39871     | Late embryogenesis abundant protein           | 13 | 50.6 | 6.67 | 2.512 | 0.0004 |
| I1N1Y7     | Uncharacterized protein                       | 2  | 8.5  | 6.95 | 2.507 | 0.0111 |
| K7MZJ0     | Sucrose synthase                              | 21 | 92.2 | 6.38 | 2.462 | 0.0001 |
| I1J7G5     | Uncharacterized protein                       | 6  | 18.6 | 5.02 | 2.413 | 0.0003 |
| K7MID0     | Uncharacterized protein                       | 8  | 96.9 | 6.39 | 2.407 | 0.0026 |
| A0A0R0HYB1 | Uncharacterized protein                       | 7  | 51.6 | 8.34 | 2.405 | 0.0365 |
| I1KB92     | Alpha-galactosidase                           | 3  | 47.6 | 6.24 | 2.394 | 0.0070 |
| C6TH01     | Uncharacterized protein                       | 4  | 29.3 | 7.08 | 2.384 | 0.0080 |
| I1MFN0     | Fumarylacetoacetase                           | 6  | 45.8 | 6.28 | 2.378 | 0.0030 |
| A0A0R0GZ36 | Uncharacterized protein                       | 5  | 41.3 | 5.99 | 2.376 | 0.0003 |
| C6TFW4     | Bet_v_1 domain-containing protein             | 6  | 16.7 | 5.05 | 2.37  | 0.0016 |
| I1KRJ7     | Thioredoxin domain-containing protein         | 13 | 24.4 | 6.92 | 2.366 | 0.0000 |
| I1JHQ7     | Uncharacterized protein                       | 5  | 59.9 | 7.69 | 2.339 | 0.0030 |
| A0A0R4J681 | Uncharacterized protein                       | 13 | 31.8 | 7.44 | 2.334 | 0.0018 |
| I1JXA0     | Uncharacterized protein                       | 19 | 90.8 | 5.24 | 2.325 | 0.0086 |
| A0A0R0I4F6 | Uncharacterized protein                       | 14 | 31.8 | 7.36 | 2.312 | 0.0001 |
| I1KSA2     | Uncharacterized protein                       | 4  | 19.5 | 6.11 | 2.312 | 0.0086 |
| I1JAU2     | Uncharacterized protein                       | 2  | 62   | 5.68 | 2.25  | 0.0286 |
| I1KNX5     | Aldehyde dehydrogenase                        | 2  | 59.7 | 7.34 | 2.246 | 0.0375 |
| I1K5Y5     | Malic enzyme                                  | 13 | 70   | 7.46 | 2.239 | 0.0051 |
| P93164     | Gamma-glutamyl hydrolase                      | 4  | 37.7 | 6.54 | 2.236 | 0.0100 |
| I1KNG0     | Uncharacterized protein                       | 8  | 55.6 | 6.9  | 2.232 | 0.0011 |
| A0A0R0I960 | Uncharacterized protein                       | 3  | 27   | 7.06 | 2.224 | 0.0009 |
| I1LLM7     | Asparagine synthetase [glutamine-hydrolyzing] | 10 | 65.2 | 6.64 | 2.223 | 0.0010 |
| I1JGR5     | Uncharacterized protein                       | 19 | 71.6 | 5.31 | 2.222 | 0.0087 |
| I1JBQ4     | DUF1338 domain-containing protein             | 7  | 41.6 | 7.93 | 2.218 | 0.0020 |
| I1M988     | Uncharacterized protein                       | 4  | 8.7  | 9.32 | 2.217 | 0.0018 |
| C6T0B7     | Glycine cleavage system H protein             | 3  | 21.9 | 6.2  | 2.214 | 0.0104 |
| I1JL98     | Uncharacterized protein                       | 5  | 18.5 | 5.38 | 2.203 | 0.0007 |
| C6T374     | VOC domain-containing protein                 | 4  | 15.4 | 5.69 | 2.201 | 0.0009 |

|            |                                                          |    |      |      |       |        |
|------------|----------------------------------------------------------|----|------|------|-------|--------|
| I1LRD2     | Stress-response A/B barrel domain-containing protein     | 5  | 12.8 | 6.52 | 2.195 | 0.0015 |
| I1LC12     | SHSP domain-containing protein                           | 3  | 22.4 | 6.02 | 2.174 | 0.0155 |
| I1KNL7     | Uncharacterized protein                                  | 3  | 42.3 | 7.93 | 2.172 | 0.0064 |
| I1NCA0     | Uncharacterized protein                                  | 2  | 22.5 | 5.86 | 2.151 | 0.0187 |
| K7MT91     | Aldo ket red domain-containing protein                   | 4  | 32.3 | 6.73 | 2.149 | 0.0114 |
| I1J5A5     | Aldedh domain-containing protein                         | 22 | 58.4 | 6.84 | 2.146 | 0.0008 |
| I1K268     | Uncharacterized protein                                  | 2  | 40.9 | 7.36 | 2.141 | 0.0230 |
| I1MT10     | Uncharacterized protein                                  | 20 | 70.8 | 5.39 | 2.14  | 0.0074 |
| B0M1A4     | Catalase                                                 | 18 | 56.7 | 7.25 | 2.139 | 0.0034 |
| A0A0R4J3V5 | MFS domain-containing protein                            | 2  | 56.4 | 8.87 | 2.137 | 0.0365 |
| Q9SWB4     | Protein ADP-ribosyltransferase PARP3                     | 21 | 91.6 | 5.59 | 2.126 | 0.0044 |
| I1K3F6     | FMN hydroxy acid dehydrogenase domain-containing protein | 7  | 40.1 | 8.32 | 2.096 | 0.0320 |
| C6TAT2     | Tau class glutathione S-transferase                      | 2  | 25.6 | 5.74 | 2.089 | 0.0250 |
| I1MQD0     | T-complex protein 1 subunit gamma                        | 21 | 60.2 | 6.18 | 2.079 | 0.0289 |
| K7KRB7     | Amidase domain-containing protein                        | 3  | 68.5 | 7.3  | 2.073 | 0.0460 |
| I1J7H3     | Ferritin                                                 | 9  | 28.7 | 6.18 | 2.065 | 0.0007 |
| I1KNN0     | ATP-dependent 6-phosphofructokinase                      | 4  | 51.1 | 6.71 | 2.063 | 0.0230 |
| A0A0R0KKR3 | Aldo ket red domain-containing protein                   | 5  | 35.2 | 6.46 | 2.051 | 0.0409 |
| I1LEP0     | FAD-binding FR-type domain-containing protein            | 2  | 32   | 7.58 | 2.047 | 0.0125 |
| I1M322     | Uncharacterized protein                                  | 9  | 46.8 | 6.95 | 2.046 | 0.0125 |
| C6SZX7     | Glutathione peroxidase                                   | 5  | 18.5 | 7.09 | 2.043 | 0.0021 |
| O81273     | Biotin carboxylase                                       | 18 | 58.8 | 7.5  | 2.042 | 0.0276 |
| I1LDP2     | Uncharacterized protein                                  | 4  | 27.9 | 8.92 | 2.042 | 0.0077 |
| I1K3K3     | Urease                                                   | 21 | 90.3 | 6.07 | 2.04  | 0.0114 |
| O48560     | Catalase-3                                               | 19 | 56.9 | 7.25 | 2.028 | 0.0446 |
| I1JSY7     | Plastocyanin                                             | 2  | 16.6 | 5.2  | 2.024 | 0.0433 |
| A0A0R0FSB9 | Uncharacterized protein                                  | 4  | 11.2 | 9.2  | 2.019 | 0.0165 |
| I1M361     | Uncharacterized protein                                  | 2  | 12.2 | 5.45 | 2.018 | 0.0035 |
| K7LA74     | Uncharacterized protein                                  | 2  | 11.4 | 9.66 | 2.017 | 0.0064 |
| C6SVT0     | Usp domain-containing protein                            | 3  | 18   | 7.15 | 2.009 | 0.0319 |
| K7LQ69     | Poly [ADP-ribose] polymerase                             | 18 | 91.1 | 5.43 | 2.007 | 0.0256 |
| I1K467     | Uncharacterized protein                                  | 18 | 59   | 6.51 | 1.987 | 0.0093 |
| I1MJ34     | Tau class glutathione S-transferase                      | 9  | 25.5 | 6.61 | 1.981 | 0.0159 |
| I1NFV9     | Uncharacterized protein                                  | 3  | 28.5 | 6.16 | 1.965 | 0.0498 |
| I1N786     | Uncharacterized protein                                  | 10 | 43.5 | 6.87 | 1.914 | 0.0152 |
| Q2I0H4     | Glyceraldehyde-3-phosphate dehydrogenase                 | 18 | 36.7 | 7.24 | 1.911 | 0.0193 |
| I1MDY5     | Amidohydro-rel domain-containing protein                 | 9  | 57.2 | 6.25 | 1.895 | 0.0325 |
| I1JIE1     | Ferritin                                                 | 10 | 27.7 | 5.96 | 1.874 | 0.0136 |
| I1JF82     | Uncharacterized protein                                  | 21 | 81.1 | 7.36 | 1.873 | 0.0096 |
| A0A0R4J455 | Uricase                                                  | 14 | 35.1 | 8.29 | 1.857 | 0.0133 |
| I1NBA5     | Uncharacterized protein                                  | 5  | 26.4 | 9.17 | 1.854 | 0.0362 |
| A0A0R0GUI6 | Uncharacterized protein                                  | 5  | 19.9 | 8.88 | 1.84  | 0.0150 |
| I1M0K3     | Cysteine proteinase inhibitor                            | 5  | 27.7 | 7.08 | 1.837 | 0.0358 |
| I1LV54     | Uncharacterized protein                                  | 9  | 46.6 | 6.8  | 1.836 | 0.0173 |
| I1KSR6     | Uncharacterized protein                                  | 12 | 39   | 5.22 | 1.826 | 0.0083 |
| Q9FQD4     | Glutathione S-transferase GST 24                         | 6  | 24.8 | 6.07 | 1.822 | 0.0146 |
| I1KRU6     | FMN hydroxy acid dehydrogenase domain-containing protein | 16 | 40.6 | 9.09 | 1.82  | 0.0092 |
| P29756     | Catalase-1/2                                             | 20 | 56.8 | 7.27 | 1.815 | 0.0093 |
| I1M222     | Uncharacterized protein                                  | 10 | 25.6 | 5.68 | 1.795 | 0.0104 |
| A0A0R4J467 | Uncharacterized protein                                  | 6  | 27.1 | 7.65 | 1.793 | 0.0413 |
| I1J7A3     | CBM20 domain-containing protein                          | 3  | 51.6 | 4.42 | 1.787 | 0.0426 |
| I1KZW8     | PAP fibrillin domain-containing protein                  | 5  | 33.6 | 5.31 | 1.785 | 0.0334 |
| A0A0R0GFW6 | Phosphoglycerate kinase                                  | 18 | 50   | 8.15 | 1.783 | 0.0381 |

|            |                                           |    |       |       |       |        |
|------------|-------------------------------------------|----|-------|-------|-------|--------|
| A0A0R0JL19 | Uncharacterized protein                   | 15 | 41    | 6.4   | 1.781 | 0.0120 |
| A0A0R4J3X4 | SHSP domain-containing protein            | 5  | 25.6  | 7.49  | 1.767 | 0.0210 |
| I1LVH0     | PKS_ER domain-containing protein          | 4  | 40.2  | 7.46  | 1.752 | 0.0426 |
| Q945U3     | Acyl-coenzyme A oxidase                   | 20 | 74.5  | 8.1   | 1.73  | 0.0193 |
| C6T9Z5     | Formate dehydrogenase, mitochondrial      | 21 | 42.8  | 6.77  | 1.719 | 0.0212 |
| I1J9Q7     | Glutamate dehydrogenase                   | 16 | 44.8  | 6.4   | 1.708 | 0.0235 |
| I1JET4     | Uncharacterized protein                   | 19 | 60.2  | 8.79  | 1.707 | 0.0332 |
| I1JU43     | NAD(P)-bd dom domain-containing protein   | 8  | 30.7  | 9.47  | 1.686 | 0.0495 |
| A0A0R0KA84 | Glyceraldehyde-3-phosphate dehydrogenase  | 18 | 36.8  | 7.58  | 1.654 | 0.0394 |
| C6TCN5     | Ferritin                                  | 10 | 28.1  | 6.04  | 1.633 | 0.0475 |
| C6SYM8     | Uncharacterized protein                   | 3  | 21.9  | 5.12  | 1.633 | 0.0472 |
| I1JF32     | H15 domain-containing protein             | 2  | 27.6  | 10.62 | 0.48  | 0.0206 |
| I1JKM1     | Uncharacterized protein                   | 3  | 32.3  | 5.17  | 0.457 | 0.0206 |
| C6TI08     | H15 domain-containing protein             | 2  | 19.8  | 10.92 | 0.454 | 0.0272 |
| C6SY81     | Uncharacterized protein                   | 4  | 15.1  | 9.31  | 0.43  | 0.0149 |
| I1JCX7     | Uncharacterized protein                   | 2  | 34.3  | 8.15  | 0.419 | 0.0026 |
| I1MBW2     | H15 domain-containing protein             | 4  | 18.9  | 10.26 | 0.418 | 0.0030 |
| K7MRH9     | Uncharacterized protein                   | 15 | 68.7  | 7.81  | 0.417 | 0.0396 |
| I1KHX1     | Histone domain-containing protein         | 4  | 23.8  | 11.12 | 0.417 | 0.0125 |
| I1N5V6     | Uncharacterized protein                   | 6  | 73.4  | 7.78  | 0.414 | 0.0095 |
| K7MXM5     | Uncharacterized protein                   | 3  | 55    | 8.92  | 0.411 | 0.0461 |
| A0A0R0KK01 | Histone H2A                               | 5  | 14.5  | 10.39 | 0.401 | 0.0003 |
| I1LAX4     | Uncharacterized protein                   | 5  | 82.9  | 7.43  | 0.4   | 0.0048 |
| A0A0R0HLG7 | Histone domain-containing protein         | 5  | 30.5  | 10.1  | 0.399 | 0.0003 |
| C6SYX1     | Histone H2A                               | 5  | 14.4  | 10.32 | 0.398 | 0.0016 |
| A0A0R0FSB1 | Uncharacterized protein                   | 4  | 79.1  | 6.62  | 0.398 | 0.0208 |
| C6SV65     | Histone H2A                               | 5  | 14.7  | 10.36 | 0.382 | 0.0001 |
| A0A0R0F3E0 | Histone H2A                               | 4  | 15.5  | 10.71 | 0.379 | 0.0001 |
| I1JE40     | Uncharacterized protein                   | 17 | 68.9  | 7.36  | 0.374 | 0.0102 |
| C6SXI6     | 40S ribosomal protein S26                 | 3  | 14.9  | 10.9  | 0.374 | 0.0243 |
| C6TC09     | Uncharacterized protein                   | 3  | 31.5  | 9.54  | 0.368 | 0.0024 |
| I1JHW6     | H15 domain-containing protein             | 5  | 18.8  | 10.42 | 0.36  | 0.0001 |
| C6SWA6     | Histone H2A                               | 4  | 15.7  | 10.67 | 0.359 | 0.0000 |
| K7MFQ7     | Uncharacterized protein                   | 7  | 68.8  | 8.5   | 0.358 | 0.0148 |
| A0A368UIC2 | Protein kinase domain-containing protein  | 6  | 51.8  | 5.48  | 0.342 | 0.0046 |
| I1JCJ8     | Uncharacterized protein                   | 3  | 31.4  | 10.08 | 0.342 | 0.0004 |
| C6SZZ5     | Histone H2A                               | 4  | 14    | 10.05 | 0.34  | 0.0000 |
| A0A0R0HEQ3 | Histone H2B                               | 4  | 16.2  | 10.08 | 0.334 | 0.0000 |
| A0A0R0EX12 | Histone H4                                | 7  | 17.9  | 11.36 | 0.33  | 0.0000 |
| I1LBM9     | H15 domain-containing protein             | 2  | 19.9  | 10.86 | 0.324 | 0.0045 |
| C6SZA4     | Histone H3                                | 5  | 15.3  | 11.3  | 0.319 | 0.0000 |
| I1N9C6     | Histone H2A                               | 5  | 15.2  | 10.39 | 0.314 | 0.0000 |
| C6SX28     | Uncharacterized protein                   | 2  | 14.2  | 9.79  | 0.302 | 0.0082 |
| A0A0R0GXD9 | Peroxidase                                | 5  | 35.3  | 7.68  | 0.3   | 0.0003 |
| C6T0Z6     | Uncharacterized protein                   | 5  | 16.6  | 9.99  | 0.295 | 0.0003 |
| A0A368UHI2 | Uncharacterized protein                   | 17 | 57.7  | 5.33  | 0.01  | 0.0000 |
| I1JU62     | Transmembrane 9 superfamily member        | 13 | 73.1  | 7.62  | 0.01  | 0.0000 |
| I1LKW4     | Uncharacterized protein                   | 12 | 62.4  | 9.11  | 0.01  | 0.0000 |
| I1K5C0     | TPR_REGION domain-containing protein      | 10 | 63.8  | 8.87  | 0.01  | 0.0000 |
| I1JP84     | Uncharacterized protein                   | 6  | 170.8 | 7.03  | 0.01  | 0.0000 |
| I1NGA5     | Uncharacterized protein                   | 5  | 37.8  | 9.25  | 0.01  | 0.0000 |
| I1LFG4     | TRANSKETOLASE_1 domain-containing protein | 5  | 80.2  | 6.57  | 0.01  | 0.0000 |
| I1KDE1     | Nas2_N domain-containing protein          | 3  | 24.9  | 5.44  | 0.01  | 0.0000 |

|            |                                          |   |       |      |      |        |
|------------|------------------------------------------|---|-------|------|------|--------|
| I1JY96     | Protein kinase domain-containing protein | 3 | 113.6 | 7.11 | 0.01 | 0.0000 |
| I1LYI2     | Uncharacterized protein                  | 3 | 17.4  | 9.7  | 0.01 | 0.0000 |
| I1J8B3     | Uncharacterized protein                  | 2 | 18.9  | 5.39 | 0.01 | 0.0000 |
| A0A0R0K3Q6 | Peptidase A1 domain-containing protein   | 2 | 75.6  | 6.74 | 0.01 | 0.0000 |
| I1KLY0     | Uncharacterized protein                  | 2 | 47.3  | 7.15 | 0.01 | 0.0000 |
| K7KYN1     | Uncharacterized protein                  | 2 | 63.3  | 4.88 | 0.01 | 0.0000 |

Abbreviation means as follows: Cov, coverage; MP, matched protein; MW, molecular weight; Cal, calculated.

Supplemental Table 3. List of changed nuclear proteins in soybean-root tip treated with plant-derived smoke solution compared with control

| Accession no | Description                                                 | MP | MW [kDa] | calc. pI | Abundance Ratio | P-Value |
|--------------|-------------------------------------------------------------|----|----------|----------|-----------------|---------|
| I1LPC3       | Uncharacterized protein OS                                  | 5  | 134.7    | 6.58     | 100             | 0.0000  |
| I1LYI2       | Uncharacterized protein OS                                  | 3  | 17.4     | 9.7      | 100             | 0.0000  |
| K7LGW1       | Uncharacterized protein OS                                  | 3  | 60.4     | 9.2      | 100             | 0.0000  |
| I1MD43       | Peroxidase OS                                               | 3  | 37.7     | 8.4      | 100             | 0.0000  |
| I1L3V3       | Uncharacterized protein OS                                  | 3  | 48.9     | 5.71     | 100             | 0.0000  |
| I1MKT0       | Uncharacterized protein OS                                  | 2  | 54.1     | 8.44     | 100             | 0.0000  |
| A0A0R0KBX5   | Glutamine amidotransferase type-2 domain-containing protein | 2  | 240.1    | 6.81     | 100             | 0.0000  |
| C6TB35       | Lipoyl-binding domain-containing protein                    | 2  | 31.5     | 9.01     | 100             | 0.0000  |
| I1JT76       | Beta-galactosidase                                          | 2  | 82       | 8.13     | 100             | 0.0000  |
| I1KMC5       | Uncharacterized protein                                     | 2  | 31.5     | 5.94     | 100             | 0.0000  |
| I1LYL9       | Uncharacterized protein                                     | 2  | 67.6     | 8.41     | 100             | 0.0000  |
| C6SWI0       | Thioredoxin domain-containing protein                       | 2  | 26.1     | 5.29     | 100             | 0.0000  |
| A0A0R0E9J3   | Uncharacterized protein                                     | 2  | 50.3     | 9.57     | 100             | 0.0000  |
| A0A0R0KRF1   | Uncharacterized protein                                     | 2  | 104.4    | 5.8      | 100             | 0.0000  |
| I1LDU4       | Uncharacterized protein                                     | 2  | 17.2     | 4.48     | 100             | 0.0000  |
| A0A0R0FH68   | NAD(P)-bd_dom domain-containing protein                     | 2  | 43.8     | 8.48     | 100             | 0.0000  |
| I1JDN7       | Glyco_trans_2-like domain-containing protein                | 2  | 38.1     | 8.57     | 100             | 0.0000  |
| I1M5Q4       | ADP,ATP carrier protein                                     | 2  | 67.5     | 9.5      | 100             | 0.0000  |
| C6TGY7       | Proliferating cell nuclear antigen                          | 3  | 29.5     | 4.79     | 29.341          | 0.0000  |
| A0A0R4J2W1   | Histone H2A                                                 | 2  | 15.3     | 10.29    | 6.987           | 0.0082  |
| C6T0A7       | Uncharacterized protein                                     | 2  | 17.5     | 10.56    | 6.269           | 0.0272  |
| I1KZ22       | X8 domain-containing protein                                | 3  | 51.3     | 9.31     | 6.221           | 0.0370  |
| I1L5M2       | Uncharacterized protein                                     | 3  | 42.8     | 8.6      | 5.876           | 0.0370  |
| I1LZI3       | Lysine--tRNA ligase                                         | 2  | 68.5     | 6.29     | 5.711           | 0.0260  |
| C6TGI7       | Uncharacterized protein                                     | 2  | 52.3     | 8.79     | 5.688           | 0.0397  |
| I1LHP2       | Uncharacterized protein                                     | 2  | 43.2     | 5.68     | 5.495           | 0.0342  |
| I1JJS2       | WD_REPEATS_REGION domain-containing protein                 | 3  | 52.1     | 4.79     | 5.458           | 0.0411  |
| C6TAF1       | Uncharacterized protein                                     | 2  | 31.7     | 8.05     | 5.391           | 0.0377  |
| I1JHW9       | CBF domain-containing protein                               | 10 | 64.8     | 8.27     | 5.143           | 0.0491  |
| A0A0R4J4D6   | Uncharacterized protein                                     | 7  | 71       | 5.21     | 0.241           | 0.0444  |
| K7MIV6       | Uncharacterized protein                                     | 5  | 23.6     | 7.33     | 0.213           | 0.0411  |
| Q2I0H4       | Glyceraldehyde-3-phosphate dehydrogenase                    | 2  | 36.7     | 7.24     | 0.198           | 0.0146  |
| A0A0R0I9M4   | Annexin                                                     | 8  | 35.5     | 8.76     | 0.194           | 0.0249  |
| I1JSR9       | MFS domain-containing protein                               | 3  | 78.7     | 5.72     | 0.19            | 0.0227  |
| I1MPM3       | Uncharacterized protein                                     | 8  | 147.6    | 6.09     | 0.188           | 0.0201  |
| G3E7M9       | Annexin                                                     | 16 | 35.9     | 6.96     | 0.182           | 0.0088  |
| I1J728       | Usp domain-containing protein                               | 3  | 18.4     | 6.05     | 0.18            | 0.0122  |
| I1LGG2       | Glutathione peroxidase                                      | 3  | 18.5     | 6.19     | 0.178           | 0.0142  |
| I1LP68       | Bet_v_1 domain-containing protein                           | 2  | 17.7     | 4.81     | 0.174           | 0.0359  |
| I1LA46       | Uncharacterized protein                                     | 2  | 30.6     | 6.68     | 0.169           | 0.0053  |
| I1N5S0       | Formate dehydrogenase, mitochondrial                        | 2  | 42.8     | 6.77     | 0.167           | 0.0126  |
| I1LV40       | PKS_ER domain-containing protein                            | 9  | 39.2     | 8.48     | 0.161           | 0.0041  |
| B3TDK9       | Lipoxygenase                                                | 4  | 96.3     | 6.81     | 0.16            | 0.0087  |
| C6SVD0       | Uncharacterized protein                                     | 2  | 12       | 5.31     | 0.158           | 0.0070  |
| A0A0R0HCG7   | PH domain-containing protein                                | 12 | 484.4    | 6.16     | 0.155           | 0.0085  |
| K7LQ69       | Poly [ADP-ribose] polymerase                                | 4  | 91.1     | 5.43     | 0.155           | 0.0083  |
| I1J7H3       | Ferritin                                                    | 3  | 28.7     | 6.18     | 0.153           | 0.0065  |
| I1JYA9       | Superoxide dismutase                                        | 2  | 26.5     | 8.66     | 0.153           | 0.0106  |
| I1KNN0       | ATP-dependent 6-phosphofructokinase                         | 14 | 51.1     | 6.71     | 0.146           | 0.0020  |
| I1J4D5       | Uncharacterized protein                                     | 3  | 26.6     | 5.9      | 0.142           | 0.0151  |

|            |                                                      |    |       |      |       |        |
|------------|------------------------------------------------------|----|-------|------|-------|--------|
| I1M138     | Peptidase A1 domain-containing protein               | 4  | 51.2  | 8    | 0.138 | 0.0031 |
| C6SVT0     | Usp domain-containing protein                        | 4  | 18    | 7.15 | 0.138 | 0.0052 |
| Q39801     | 51 kDa seed maturation protein                       | 11 | 51    | 7.11 | 0.134 | 0.0011 |
| A0A0R0FFL6 | Uncharacterized protein                              | 2  | 57.3  | 7.53 | 0.13  | 0.0019 |
| I1LRD2     | Stress-response A/B barrel domain-containing protein | 2  | 12.8  | 6.52 | 0.128 | 0.0024 |
| Q9SWB4     | Protein ADP-ribosyl transferase PARP3                | 3  | 91.6  | 5.59 | 0.126 | 0.0045 |
| Q8RVH5     | Basic 7S globulin 2                                  | 7  | 47.2  | 8.25 | 0.124 | 0.0021 |
| I1M599     | Lipoxygenase                                         | 6  | 92.7  | 7.01 | 0.124 | 0.0006 |
| Q39873     | Lea protein                                          | 9  | 49.4  | 7.52 | 0.123 | 0.0019 |
| Q9FQD4     | Glutathione S-transferase GST 24                     | 5  | 24.8  | 6.07 | 0.123 | 0.0016 |
| Q9XET0     | Seed maturation protein PM30                         | 3  | 15.1  | 8.9  | 0.123 | 0.0016 |
| I1MT10     | Uncharacterized protein                              | 2  | 70.8  | 5.39 | 0.123 | 0.0021 |
| I1M596     | Lipoxygenase                                         | 21 | 97.2  | 6.67 | 0.122 | 0.0005 |
| P0DO16     | Beta-conglycinin alpha subunit 1                     | 10 | 70.3  | 5.17 | 0.119 | 0.0004 |
| C6T0B5     | Uncharacterized protein                              | 3  | 14    | 6.15 | 0.119 | 0.0012 |
| A0A0R4J3X4 | SHSP domain-containing protein                       | 3  | 25.6  | 7.49 | 0.119 | 0.0015 |
| A0A0R0FH00 | Uncharacterized protein                              | 3  | 71.2  | 5.22 | 0.116 | 0.0018 |
| A0A0R0GZ36 | Uncharacterized protein                              | 4  | 41.3  | 5.99 | 0.109 | 0.0010 |
| I1JIE1     | Ferritin                                             | 3  | 27.7  | 5.96 | 0.108 | 0.0004 |
| I1MNX4     | Glutathione reductase                                | 2  | 54    | 5.85 | 0.108 | 0.0029 |
| I1LLR5     | Uncharacterized protein                              | 2  | 27.7  | 5.71 | 0.106 | 0.0011 |
| K7LDT9     | Uncharacterized protein                              | 5  | 103.3 | 6.76 | 0.103 | 0.0025 |
| A0A0R0FSB9 | Uncharacterized protein                              | 2  | 11.2  | 9.2  | 0.1   | 0.0004 |
| P11828     | Glycinin G3                                          | 9  | 54.2  | 5.97 | 0.097 | 0.0003 |
| I1MJ34     | Tau class glutathione S-transferase                  | 4  | 25.5  | 6.61 | 0.096 | 0.0002 |
| I1M1V8     | Uncharacterized protein                              | 11 | 63.4  | 6.11 | 0.093 | 0.0001 |
| I1JL80     | Ferritin                                             | 2  | 29.1  | 6.38 | 0.086 | 0.0001 |
| C6T2N0     | PRA1 family protein                                  | 2  | 20.4  | 9.52 | 0.086 | 0.0005 |
| K7K3R6     | Uncharacterized protein                              | 2  | 36.8  | 6.39 | 0.085 | 0.0006 |
| I1KNG0     | Uncharacterized protein                              | 3  | 55.6  | 6.9  | 0.082 | 0.0001 |
| A0A0R4J467 | Uncharacterized protein                              | 4  | 27.1  | 7.65 | 0.08  | 0.0000 |
| C6SYM8     | Uncharacterized protein                              | 3  | 21.9  | 5.12 | 0.08  | 0.0001 |
| C6SWV4     | Uncharacterized protein                              | 5  | 18.8  | 6.32 | 0.077 | 0.0000 |
| I1JL98     | Uncharacterized protein                              | 3  | 18.5  | 5.38 | 0.075 | 0.0000 |
| K7KVC7     | Knot1 domain-containing protein                      | 2  | 8.6   | 8.46 | 0.074 | 0.0000 |
| I1LDP2     | Uncharacterized protein                              | 7  | 27.9  | 8.92 | 0.073 | 0.0000 |
| O23957     | Dehydrin                                             | 2  | 17.3  | 9.23 | 0.071 | 0.0000 |
| A0A0R4J3N3 | SHSP domain-containing protein                       | 3  | 18.2  | 7.5  | 0.07  | 0.0000 |
| A0A0R0ENV4 | Uncharacterized protein                              | 4  | 23.5  | 5.3  | 0.068 | 0.0000 |
| I1KMS6     | Uncharacterized protein                              | 5  | 19    | 7.5  | 0.064 | 0.0000 |
| K7MZJ0     | Sucrose synthase                                     | 9  | 92.2  | 6.38 | 0.058 | 0.0000 |
| B3TDK6     | Lipoxygenase                                         | 36 | 96.7  | 6.58 | 0.057 | 0.0000 |
| I1JXY0     | Uncharacterized protein                              | 4  | 30.5  | 9.42 | 0.056 | 0.0000 |
| I1M988     | Uncharacterized protein                              | 3  | 8.7   | 9.32 | 0.054 | 0.0000 |
| A0A0R0I4F6 | Uncharacterized protein                              | 5  | 31.8  | 7.36 | 0.052 | 0.0000 |
| I1L957     | Uncharacterized protein                              | 6  | 48.8  | 6.42 | 0.051 | 0.0000 |
| K7LEQ5     | Uncharacterized protein                              | 5  | 26.6  | 6.8  | 0.05  | 0.0000 |
| I1LOS5     | Uncharacterized protein                              | 3  | 19    | 6.93 | 0.05  | 0.0000 |
| Q9SWB6     | Probable bifunctional TENA-E protein                 | 6  | 26    | 5.35 | 0.048 | 0.0000 |
| C6T871     | Uncharacterized protein                              | 10 | 40.1  | 6.68 | 0.045 | 0.0000 |
| I1KSR6     | Uncharacterized protein                              | 7  | 39    | 5.22 | 0.043 | 0.0000 |
| A0A0R0H569 | Lipoxygenase                                         | 25 | 92.8  | 6.48 | 0.039 | 0.0000 |
| A0A0R0J965 | Uncharacterized protein                              | 7  | 34.4  | 6.9  | 0.037 | 0.0000 |

|            |                                                        |    |       |      |       |        |
|------------|--------------------------------------------------------|----|-------|------|-------|--------|
| I1KRJ7     | Thioredoxin domain-containing protein                  | 10 | 24.4  | 6.92 | 0.034 | 0.0000 |
| A0A0R0HVK7 | Uncharacterized protein                                | 8  | 22.2  | 6.52 | 0.031 | 0.0000 |
| Q9ZNZ4     | Napin-type 2S albumin 1                                | 5  | 17.8  | 6.38 | 0.031 | 0.0000 |
| C6T1V2     | SHSP domain-containing protein                         | 2  | 17.7  | 6.81 | 0.031 | 0.0000 |
| K7K4G2     | Cupin_1 domain-containing protein                      | 13 | 71.7  | 5.49 | 0.03  | 0.0000 |
| I1LHP6     | Cupin_1 domain-containing protein                      | 12 | 81.7  | 5.34 | 0.028 | 0.0000 |
| A0A0R4J681 | Uncharacterized protein                                | 4  | 31.8  | 7.44 | 0.027 | 0.0000 |
| Q9XER5     | Seed maturation protein PM22                           | 4  | 16.7  | 5.36 | 0.026 | 0.0000 |
| I1JF86     | Uncharacterized protein                                | 18 | 57.8  | 6.6  | 0.025 | 0.0000 |
| Q9ZTZ3     | Reticulon-like protein                                 | 3  | 24.2  | 9.17 | 0.025 | 0.0000 |
| I1JFX0     | Usp domain-containing protein                          | 7  | 20.7  | 7.17 | 0.022 | 0.0000 |
| I1NGG4     | Uncharacterized protein                                | 7  | 26    | 5.02 | 0.021 | 0.0000 |
| P11827     | Beta-conglycinin alpha' subunit                        | 23 | 72.2  | 5.71 | 0.019 | 0.0000 |
| I1L860     | Uncharacterized protein                                | 21 | 58    | 6.49 | 0.018 | 0.0000 |
| P01071     | Trypsin inhibitor B                                    | 9  | 20    | 4.82 | 0.018 | 0.0000 |
| P04776     | Glycinin G1                                            | 13 | 55.7  | 6.23 | 0.017 | 0.0000 |
| A0A0R0HYM3 | Uncharacterized protein                                | 20 | 69.6  | 6.32 | 0.016 | 0.0000 |
| I1KBN9     | Uncharacterized protein                                | 4  | 29.5  | 9.66 | 0.015 | 0.0000 |
| I1K554     | Knot1 domain-containing protein                        | 2  | 8.4   | 9.16 | 0.013 | 0.0000 |
| I1M3M9     | Uncharacterized protein                                | 11 | 67.9  | 6.58 | 0.01  | 0.0000 |
| I1L849     | Uncharacterized protein                                | 10 | 27.4  | 5.29 | 0.01  | 0.0000 |
| I1LE41     | Uncharacterized protein                                | 7  | 26.2  | 4.89 | 0.01  | 0.0000 |
| I1JRD0     | Uncharacterized protein                                | 6  | 110   | 5.62 | 0.01  | 0.0000 |
| I1LBB9     | Lipoxygenase                                           | 6  | 98.1  | 5.92 | 0.01  | 0.0000 |
| A0A0B5E8V1 | Tau class glutathione S-transferase                    | 5  | 25.9  | 6.7  | 0.01  | 0.0000 |
| P19594     | 2S albumin                                             | 5  | 18.4  | 5.34 | 0.01  | 0.0000 |
| I1ND86     | SHSP domain-containing protein                         | 5  | 17.9  | 7.2  | 0.01  | 0.0000 |
| I1LNN8     | DUF4149 domain-containing protein                      | 4  | 39.9  | 9.29 | 0.01  | 0.0000 |
| Q9ZTY1     | 35 kDa seed maturation protein                         | 4  | 35.3  | 6.32 | 0.01  | 0.0000 |
| K7MBG3     | Sucrose synthase                                       | 4  | 91.5  | 6.24 | 0.01  | 0.0000 |
| I1MYB0     | Uncharacterized protein                                | 4  | 53.4  | 6.09 | 0.01  | 0.0000 |
| C6SWV3     | Uncharacterized protein                                | 4  | 27.6  | 6.1  | 0.01  | 0.0000 |
| C6TH01     | Uncharacterized protein                                | 4  | 29.3  | 7.08 | 0.01  | 0.0000 |
| I1JXA0     | Uncharacterized protein                                | 3  | 90.8  | 5.24 | 0.01  | 0.0000 |
| C6TFW8     | Uncharacterized protein                                | 3  | 25.9  | 7.3  | 0.01  | 0.0000 |
| I1N8B5     | Uncharacterized protein                                | 3  | 76    | 5.47 | 0.01  | 0.0000 |
| Q39872     | PGmPM3                                                 | 3  | 19.5  | 9.83 | 0.01  | 0.0000 |
| A0A0R0I960 | Uncharacterized protein                                | 3  | 27    | 7.06 | 0.01  | 0.0000 |
| P05478     | 18.5 kDa class I heat shock protein                    | 3  | 18.5  | 6.09 | 0.01  | 0.0000 |
| C6SYG6     | Uncharacterized protein                                | 2  | 21.8  | 4.84 | 0.01  | 0.0000 |
| I1J5H1     | Serine/threonine-protein phosphatase                   | 2  | 34.9  | 5.01 | 0.01  | 0.0000 |
| I1MCF0     | Uncharacterized protein                                | 2  | 45.2  | 6.43 | 0.01  | 0.0000 |
| K7MID0     | Uncharacterized protein                                | 2  | 96.9  | 6.39 | 0.01  | 0.0000 |
| Q42447     | Maturation protein                                     | 2  | 25.6  | 6.52 | 0.01  | 0.0000 |
| I1MDN4     | Importin N-terminal domain-containing protein          | 2  | 118.7 | 5.02 | 0.01  | 0.0000 |
| I1JUJ8     | t-SNARE coiled-coil homology domain-containing protein | 2  | 37.5  | 8.87 | 0.01  | 0.0000 |
| I1KZW8     | PAP fibrillin domain-containing protein                | 2  | 33.6  | 5.31 | 0.01  | 0.0000 |
| I1MHY4     | Uncharacterized protein                                | 2  | 59.8  | 6.74 | 0.01  | 0.0000 |
| P04405     | Glycinin G2                                            | 2  | 54.4  | 5.58 | 0.01  | 0.0000 |
| A0A0R0JWF4 | Uncharacterized protein                                | 2  | 84.8  | 7.42 | 0.01  | 0.0000 |
| P02858     | Glycinin G4                                            | 2  | 63.8  | 5.29 | 0.01  | 0.0000 |
| K7LTG4     | Uncharacterized protein                                | 2  | 44.6  | 7.08 | 0.01  | 0.0000 |
| I1JIE6     | Uncharacterized protein                                | 2  | 67.9  | 8.53 | 0.01  | 0.0000 |

|            |                                        |   |      |       |      |        |
|------------|----------------------------------------|---|------|-------|------|--------|
| I1JGB2     | S-formylglutathione hydrolase          | 2 | 32.1 | 7.05  | 0.01 | 0.0000 |
| K7MH28     | Uncharacterized protein                | 2 | 58.3 | 6.49  | 0.01 | 0.0000 |
| P25974     | Beta-conglycinin beta subunit 1        | 2 | 50.4 | 6.24  | 0.01 | 0.0000 |
| I1MAS2     | Uncharacterized protein                | 2 | 43.5 | 6.24  | 0.01 | 0.0000 |
| A0A0R0JP17 | Oleosin                                | 2 | 21.4 | 10.27 | 0.01 | 0.0000 |
| M1FQK6     | NADH-ubiquinone oxidoreductase chain 4 | 2 | 54.8 | 9.22  | 0.01 | 0.0000 |
| I1JT73     | Uncharacterized protein                | 2 | 49.1 | 7.56  | 0.01 | 0.0000 |
| I1L6A3     | Uncharacterized protein                | 2 | 45.7 | 7.58  | 0.01 | 0.0000 |
| A0A0R0L186 | SHSP domain-containing protein         | 2 | 17.3 | 7.42  | 0.01 | 0.0000 |
| I1MQD2     | BOWMAN_BIRK domain-containing protein  | 2 | 12.2 | 6.04  | 0.01 | 0.0000 |
| I1KSL6     | Uncharacterized protein                | 2 | 59.1 | 6.35  | 0.01 | 0.0000 |
| C6TM03     | Malate dehydrogenase                   | 2 | 37.4 | 8.29  | 0.01 | 0.0000 |
| I1K268     | Uncharacterized protein                | 2 | 40.9 | 7.36  | 0.01 | 0.0000 |
| K7MT91     | Aldo_ket_red domain-containing protein | 2 | 32.3 | 6.73  | 0.01 | 0.0000 |
| I1LS05     | Uncharacterized protein                | 2 | 45.8 | 7.02  | 0.01 | 0.0000 |
| C6TP11     | acidPPc domain-containing protein      | 2 | 36.3 | 7.47  | 0.01 | 0.0000 |
| A0A0R0IVF1 | Uncharacterized protein                | 2 | 48   | 8.22  | 0.01 | 0.0000 |

Abbreviation means as follows: Cov, coverage; MP, matched protein; MW, molecular weight; Cal, calculated.
